# Supplementary material
Source: PubMed Central journal article supplement (PMC1464324)

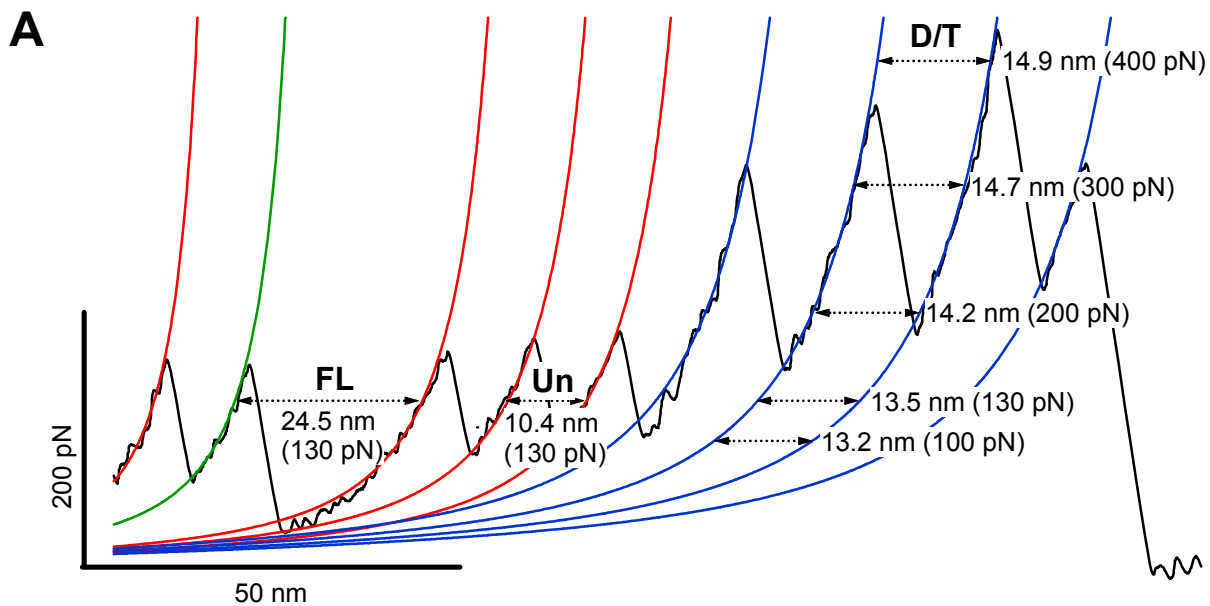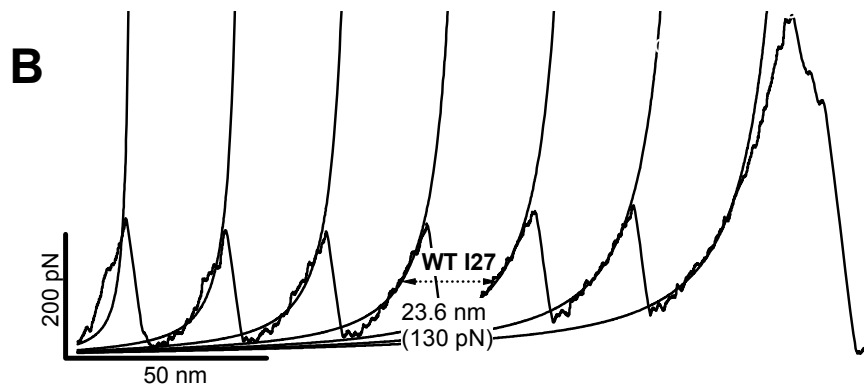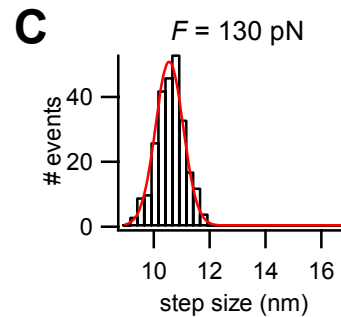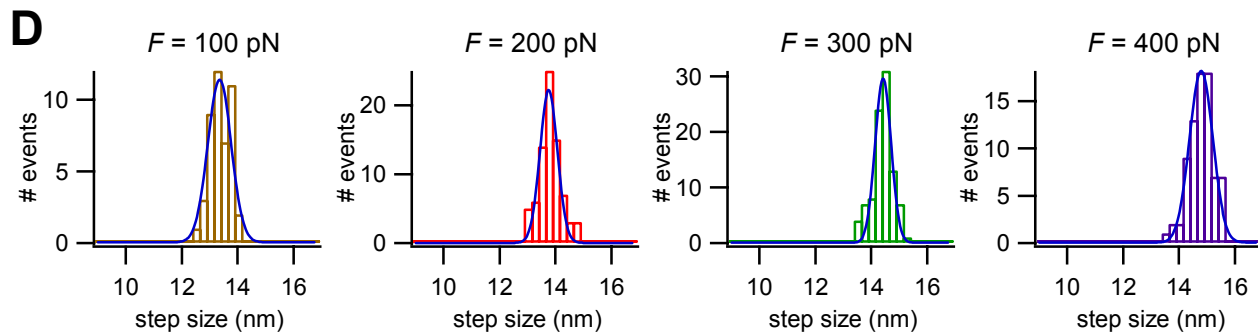

Supplement: pnas_0511035103_1.pdf [file pnas_0511035103_1.pdf]

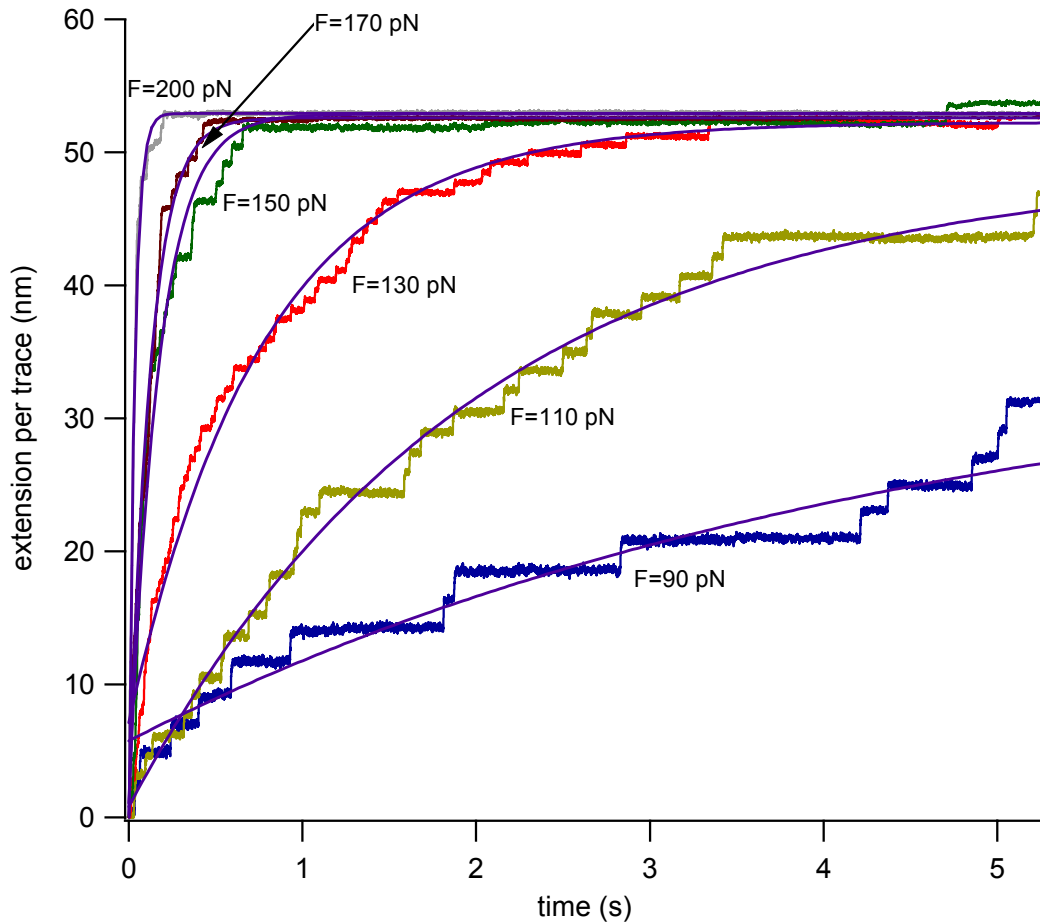

Supplement: pnas_0511035103_2.pdf [file pnas_0511035103_2.pdf]
